# Supplementary material
Source: publisher site journal article supplement (https://www.dovepress.com/article/541042)
Supplement: Supplementary file 1 [file Supplementary%20data_1.docx]

**Supplementary data**

Manuscript ID number: 541042

Title of paper: Royal jelly extracellular vesicles enhance diabetic wound healing via inflammation modulation, fibroblast migration, and angiogenesis

Yen-Yu Tsai 1 , Long-Sen Chang 1 , Chun-Wen Lan 1,2,3 ,Ying-Jung Chen 4,5,6,*, Jen-Hao Yang 1,*

1 Institute of Biomedical Sciences, National Sun Yat-Sen University, Kaohsiung, Taiwan

2 SCT-BioMed Co., Ltd., Kaohsiung, Taiwan

3 Department of Medical Education and Research, Kaohsiung Veterans General Hospital, Kaohsiung, Taiwan

4 Department of Fragrance and Cosmetic Science, Kaohsiung Medical University, Kaohsiung, Taiwan

5 Drug Development and Value Creation Research Center, Kaohsiung Medical University, Kaohsiung, Taiwan

6 Department of Medical Research, Kaohsiung Medical University Hospital, Kaohsiung, Taiwan

ORCiD:

Y.-Y.T. 0000-0003-0715-5227

L.-S.C. 0000-0002-3204-5137

Y.-J.C. 0000-0001-8562-1268

J.-H.Y. 0009-0004-4320-0843

C.-W.L. 0000-0001-5042-685X

**Supplementary Figure 1**


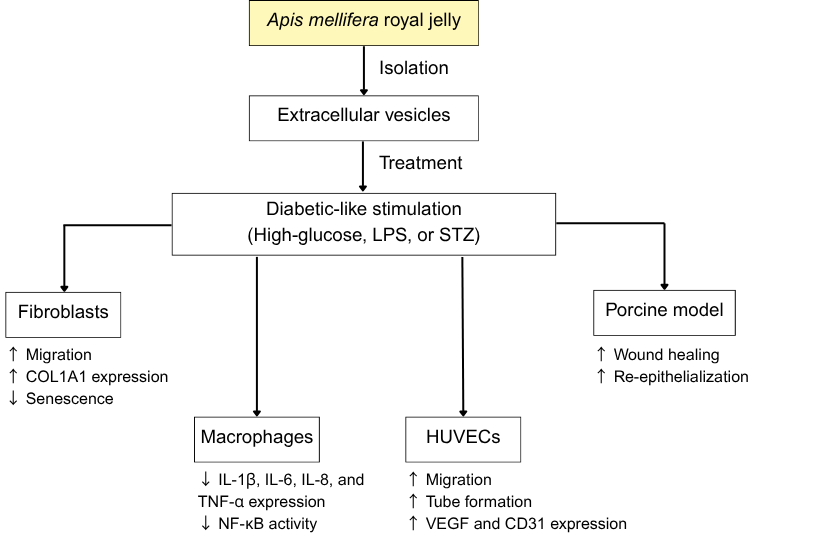


**Supplementary Figure 1. Mechanistic diagram summarizing the effect of RJEVs on diabetic wound healing.** This diagram shows the diabetic-like wound healing mechanism of RJEVs *in vitro* and *in vivo*. *In vitro* functions include (1) decreased senescence, accelerated migration, and increased COL1A1 expression in high-glucose-stimulated fibroblasts, (2) decreased cytokine expression (IL-1β, IL-6, IL-8, and TNF-α) and NF-κB activity in LPS-induced RAW-BlueTM and THP-1, (3) enhanced migration, tube formation, and VEGF and CD31 protein expression in high-glucose-stimulated HUVECs. *In vivo* findings include accelerated wound healing in STZ-induced porcine models by enhancing re-epithelialization.

**Supplementary Figure 2**


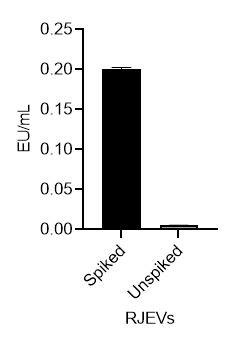


**Supplementary Figure 2. Endotoxin levels of unspiked and spiked RJEVs (20 μg/mL).** Endotoxin levels were assessed by the ToxinSensorTM Endotoxin Detection System kit and quantified. Spiked samples = RJEVs + Standard, to detect endotoxin interference (false negative results); unspiked samples = RJEVs. Calculated spike recovery was 78%, which is within the acceptable range (50 - 200 %). Recovery % = [(Spiked result - Unspiked result) / Spike added] x 100. n = 8.

**Supplementary Figure 3**


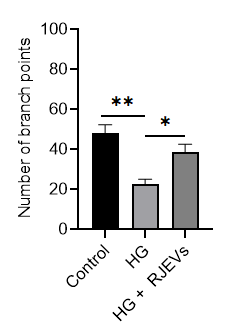


**Supplementary Figure 3. Number of branch points of HG-stimulated and RJEVs treated HUVECs.** HUVECs were treated with 20 μg/mL RJEVs in the presence of absence of HG stimulation. Data are shown as mean ± SD of three independent biological replicates. n = 3. **p* < 0.05, ***p* < 0.01; HG samples are compared to control and HG + RJEVs samples are compared to HG samples.

**Supplementary Figure 4**


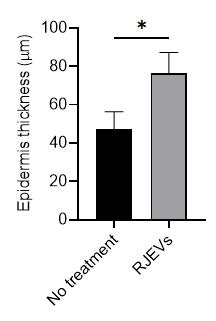


**Supplementary Figure 4. Epidermal thickness of expanded skin in diabetic porcine.** Epidermal thickness qualification of “no treatment” and “RJEVs” sample groups. Data are shown as mean ± SD of four independent biological replicates. n = 4. **p* < 0.05; RJEVs group is compared to the no treatment group.
